# Supplementary material for: Evaluating Cognitive Load in Clinical Workflows Highlights Leverage Points for Guideline-Concordant Statin Initiation
Source: Research Square preprint supplement (doi:10.21203/rs.3.rs-7632374/v1), 2025-10-27
Supplement: Supplementary file 1 [file ebc3cc1a8e59358e6a6fe6a1.xlsx]

## Sheet: Metadata
Section Number	Section Name	Number of Words		Total Words	5149
Abstract	N/A	299		Main Tables	6
1.1	Research Goals and Hypotheses	150		Main Figures	2
1.2	Literature Contribution Table	144		Supplement Tables	5
2.1	Clinical Context: Statin Prescribing for ASCVD Risk Prevention	195
2.2	EHR Metadata to Evaluate EHR Utilization	525
3	Methods	70
3.1	Population and Number of Observations	40
3.2	Data Inclusion and Exclusion	234
3.3	Data and Data Structure	307
3.4	Analytical Methods	8
3.4.1	Descriptive Statistics	101
3.4.2	Associations Between Statin Prescribing and Cognitive Load Metrics	450
3.4.3	Exploratory Analyses - Sources of Cognitive Load within the EHR	392
4.1	Descriptive Results	291
4.2	Regression Analyses between Cognitive Load Metrics and Statin Initiation	144
4.2.1	Linear Effect of Cognitive Metrics on Statin Initiatin	134
4.2.2	Nonlinear Effects of Cognitive Metrics on Statin Initiation	282
4.3	Exploratory Analyses for EHR Events Associated with Cognitive Load Metrics	483
5.1	Summary	247
5.2	Implications	341
5.3	Limitations	554
6	Conclusion	201

## Sheet: Table A.1.
Table A.1.	Statins that were identified as initiated for patients in the Electronic Health Record
Source	Program/Category	Medication	Formulation
Electronic Prescribing	BEST CARE	AMLODIPINE/ATORVASTATIN	ORAL
Electronic Prescribing	BEST CARE	ATORVASTATIN CALCIUM	ORAL
Electronic Prescribing	BEST CARE	EZETIMIBE/ATORVASTATIN CALCIUM	ORAL
Electronic Prescribing	BEST CARE	EZETIMIBE/ROSUVASTATIN CALCIUM	ORAL
Electronic Prescribing	BEST CARE	EZETIMIBE/SIMVASTATIN	ORAL
Electronic Prescribing	BEST CARE	FLUVASTATIN SODIUM	ORAL
Electronic Prescribing	BEST CARE	LOVASTATIN	ORAL
Electronic Prescribing	BEST CARE	NIACIN/LOVASTATIN	ORAL
Electronic Prescribing	BEST CARE	NIACIN/SIMVASTATIN	ORAL
Electronic Prescribing	BEST CARE	PITAVASTATIN CALCIUM	ORAL
Electronic Prescribing	BEST CARE	PITAVASTATIN MAGNESIUM	ORAL
Electronic Prescribing	BEST CARE	PRAVASTATIN SODIUM	ORAL
Electronic Prescribing	GENERAL JCCM	STATIN MEDICATIONS	—
Electronic Prescribing	GENERAL MU	STATIN	—
Hospital Prescribing	—	FLUVASTATIN AND PITAVASTATIN	—
Hospital Prescribing	—	HMGCOA AND EZETIMIBE	—
Hospital Prescribing	—	MEDICATIONS FOR STATIN	—
Hospital Prescribing	PROTOCOL	HMG COA REDUCTASE INHIBITORS (STATINS) PHARMACEUTICAL SUBCLASS GROUPER	—

## Sheet: Table A.2.
Table A.2.	Codes for Diagnoses for Patient Eligibility for Statins
Criteria	ICD-10 Codes
Type 2 Diabetes	E11.0–E11.9
Hepatitis	B15–B19. K73.0–K73.9, K75.0–K75.9
Cirrhosis	K74.60–K74.69
End-Stage Renal Disease	N18.6
Chronic Kidney Disease	N18.1–N18.5, N18.9
Myocardial Infarction	I21.0–I21.9, I22.0–I22.9
Stroke	I60.0–I60.9, I61.0–I61.9,I62.0–I62.9, I63.0–I63.9, I64

## Sheet: Table A.3.
Table A.3.	Regression Comparisons between the Linear and Quadratic Model
	Reference Level	Linear Model	Quadratic Model
Number of Loops	--	−6.324e−04	−1.239e−02***
		(8.576e−04)	(2.123e−03)
Number of Loops²			6.597e−05***
			(1.021e−05)
Number of Distinct Events	--	−2.020e−02***	6.412e−02***
		(2.956e−03)	(8.381e−03)
Distinct Events²			−1.787e−03***
			(1.762e−04)
Total Duration (min)	--	8.709e−03***	8.223e−03***
		(1.419e−03)	(1.436e−03)
Avg Time Per Event (sec)	--	−5.404e−04***	−5.017e−04***
		(1.314e−04)	(1.314e−04)
Race: Black/African American	Non-Hispanic/Latinx White	1.952e−01**	1.967e−01**
		(6.555e−02)	(6.567e−02)
Race: Hispanic/Latino	--	5.870e−01***	5.906e−01***
		(6.500e−02)	(6.508e−02)
Race: Asian	--	4.448e−01***	4.425e−01***
		(8.050e−02)	(8.083e−02)
Race: Other		6.752e−01***	6.839e−01***
		(6.337e−02)	(6.363e−02)
Patient Age		9.666e−03***	1.023e−02***
		(2.093e−03)	(2.101e−03)
Patient Sex: Female	Male	−9.343e−02*	−8.218e−02*
		(4.090e−02)	(4.103e−02)
Patient Sex: Unknown		−2.007e+01***	−2.016e+01***
		(5.249e−02)	(5.316e−02)
Insurance: Non-commercial	Commercial	5.906e−02	5.738e−02
		(5.452e−02)	(5.466e−02)
Number of Active Diagnoses		−5.600e−02***	−4.879e−02***
		(7.517e−03)	(7.546e−03)
Elixhauser Comorbidity Index		−9.401e−03*	−9.656e−03**
		(3.736e−03)	(3.742e−03)
Num.Obs.		36131	36131
R2		0.197	0.2
R2 Adj.		0.125	0.128
R2 Within		0.018	0.022
R2 Within Adj.		0.017	0.021
RMSE		0.43	0.43

## Sheet: Table A.4.
Table A.4.	Full Table of Significant SHAP Values
Metric Name	Plain Language Name	Cognitive Load Metric	Mean SHAP Value	Global Mean SHAP Value	SE SHAP Value	95% CI Lower	95% CI Upper	Contribution Direction	Relative Contribution	Cumulative Contribution
In Basket message viewed	Patient communications viewed	Average Time Per Event (sec)	0.0873936	0.720492	0.00712977	0.0734193	0.101368	Increasing	0.231282	0.231282
SmartSet suggested	Order Set suggested	Average Time Per Event (sec)	0.0129381	0.396745	0.0035872	0.00590718	0.019969	Increasing	0.127357	0.358639
Order list changed	Order list changed	Average Time Per Event (sec)	-0.0115294	0.240993	0.00260242	-0.0166302	-0.00642868	Decreasing	0.07736	0.435999
SmartSet suggested	Order Set suggested	Event Shown (1/0)	0.0114638	0.20298	0.00186486	0.00780865	0.0151189	Increasing	0.0651576	0.501157
Results reviewed in IB	Results reviewed in patient communications	Average Time Per Event (sec)	0.0293414	0.132105	0.0014761	0.0264483	0.0322346	Increasing	0.0424065	0.543563
Order list changed	Order list changed	Number of Loops	-0.00899256	0.116383	0.0011033	-0.011155	-0.00683008	Decreasing	0.0373595	0.580923
SmartSets activity selected	Order Sets activity selected	Average Time Per Event (sec)	0.0042672	0.1091	0.0011923	0.00193029	0.00660412	Increasing	0.0350218	0.615945
OurPractice Advisories displayed	Care Alerts displayed	Average Time Per Event (sec)	-0.00511507	0.10044	0.000899211	-0.00687752	-0.00335261	Decreasing	0.0322418	0.648187
Problem List modified	Problem List modified	Number of Loops	-0.00212917	0.0825814	0.000997486	-0.00408424	-0.000174095	Decreasing	0.0265091	0.674696
Chart Review Encounter report viewed	Chart Review Encounter report viewed	Average Time Per Event (sec)	-0.00239903	0.0806895	0.000720398	-0.00381101	-0.000987049	Decreasing	0.0259018	0.700597
LOS form accessed from visit navigator	Level of Service form accessed from visit navigator	Event Shown (1/0)	0.00291072	0.0693164	0.00107492	0.000803887	0.00501756	Increasing	0.022251	0.722848
Child order released for a procedure order	Additional order released for a procedure order	Average Time Per Event (sec)	-0.00442994	0.0623753	0.000737945	-0.00587631	-0.00298357	Decreasing	0.0200228	0.742871
Report with patient data viewed	Report with patient data viewed	Number of Loops	0.00171768	0.0612936	0.000545503	0.000648492	0.00278686	Increasing	0.0196756	0.762547
Clinical Note Signed	Clinical Note Signed	Average Time Per Event (sec)	-0.00242977	0.0605346	0.000566916	-0.00354092	-0.00131861	Decreasing	0.019432	0.781979
Visit diagnoses modified	Visit diagnoses modified	Number of Loops	0.00508093	0.0568161	0.000552772	0.00399749	0.00616436	Increasing	0.0182383	0.800217
Pend clinical note	Pend clinical note	Average Time Per Event (sec)	0.00105157	0.0378277	0.000402879	0.000261928	0.00184122	Increasing	0.0121429	0.81236
Chart Review Note report viewed	Chart Review Note report viewed	Average Time Per Event (sec)	-0.000924445	0.0363353	0.000432435	-0.00177202	-7.6872e-05	Decreasing	0.0116638	0.824024
SmartSets activity selected	Order Sets activity selected	Event Shown (1/0)	0.00384004	0.0344044	0.000576994	0.00270913	0.00497095	Increasing	0.011044	0.835068
Charge Capture section accepted	Billing charges confirmed	Event Shown (1/0)	-0.000850791	0.0309884	0.000423491	-0.00168083	-2.07484e-05	Decreasing	0.00994744	0.845015
OP Care Plan task added	Outpatient Care Plan task added	Average Time Per Event (sec)	0.00131478	0.028516	0.000509648	0.000315875	0.00231369	Increasing	0.00915379	0.854169
Allergies activity accessed	Allergies activity accessed	Average Time Per Event (sec)	0.00119457	0.0261646	0.000350938	0.000506728	0.0018824	Increasing	0.00839898	0.862568
Medication long-term status modified	Medication long-term status modified	Average Time Per Event (sec)	0.000942008	0.0224691	0.000367606	0.000221501	0.00166252	Increasing	0.00721272	0.869781
Diagnosis association updated	Diagnosis association updated	Average Time Per Event (sec)	0.00175744	0.0223103	0.000299715	0.00117	0.00234488	Increasing	0.00716174	0.876942
Report with patient data printed	Report with patient data printed	Average Time Per Event (sec)	0.00336746	0.022013	0.000650183	0.0020931	0.00464182	Increasing	0.00706631	0.884009
Results reviewed in IB	Results reviewed in patient communications	Number of Loops	0.00279638	0.0214144	0.000280821	0.00224597	0.00334679	Increasing	0.00687416	0.890883
In Basket message viewed	Patient communications viewed	Number of Loops	0.00141885	0.0213747	0.000189748	0.00104694	0.00179076	Increasing	0.0068614	0.897744
Results acknowledged in IB	Results acknowledged in patient communication	Event Shown (1/0)	0.00386263	0.0183747	0.000207912	0.00345512	0.00427014	Increasing	0.00589838	0.903643
SmartSet used	Order Set used	Average Time Per Event (sec)	0.000911676	0.0172271	0.000387494	0.000152188	0.00167116	Increasing	0.00553	0.909173
Allergies activity accessed	Allergies activity accessed	Number of Loops	0.000536724	0.0166367	0.000199933	0.000144855	0.000928592	Increasing	0.00534048	0.914513
Review Diagnoses Window changes saved	Diagnosis list updates saved	Average Time Per Event (sec)	-0.00251518	0.0164739	0.000400313	-0.00329979	-0.00173056	Decreasing	0.00528822	0.919801
Results acknowledged in IB	Results acknowledged in patient communication	Number of Loops	0.000839542	0.0140748	0.000196267	0.00045486	0.00122423	Increasing	0.0045181	0.924319
Visit Navigator template loaded	Visit Navigator template loaded	Number of Loops	0.00226019	0.0124924	0.000130651	0.00200411	0.00251627	Increasing	0.00401014	0.92833
LOS visit navigator section accessed	Level of Service visit navigator section accessed	Average Time Per Event (sec)	0.000552176	0.0120957	0.000116046	0.000324726	0.000779627	Increasing	0.0038828	0.932212
Care Teams exited	Care Teams exited	Average Time Per Event (sec)	-0.00111036	0.0112112	0.00020716	-0.00151639	-0.000704324	Decreasing	0.00359886	0.935811
SmartSet suggested	Order Set suggested	Number of Loops	-0.00216316	0.0108279	0.000120047	-0.00239845	-0.00192787	Decreasing	0.00347581	0.939287
Synopsis activity accessed	Synopsis activity accessed	Average Time Per Event (sec)	-0.000374674	0.0104313	0.000161869	-0.000691937	-5.74111e-05	Decreasing	0.00334851	0.942636
OurPractice Advisories displayed	Care Alerts displayed	Number of Loops	-0.00190546	0.00989652	0.000133254	-0.00216664	-0.00164429	Decreasing	0.00317684	0.945812
Chart Review Note report viewed	Chart Review Note report viewed	Number of Loops	-0.000525199	0.00935089	0.000203319	-0.000923705	-0.000126693	Decreasing	0.00300169	0.948814
Results Review accessed	Results Review accessed	Average Time Per Event (sec)	0.00087464	0.00798684	0.000137401	0.000605335	0.00114394	Increasing	0.00256382	0.951378
Chief Complaint modified	Chief Complaint modified	Average Time Per Event (sec)	0.00267332	0.00732603	0.00012416	0.00242997	0.00291667	Increasing	0.0023517	0.95373
Chart Review Order report viewed	Chart Review Order report viewed	Average Time Per Event (sec)	-0.00137374	0.00708157	0.000106815	-0.0015831	-0.00116438	Decreasing	0.00227322	0.956003
Report with patient data viewed	Report with patient data viewed	Average Time Per Event (sec)	0.000281013	0.00688665	0.000135542	1.53513e-05	0.000546674	Increasing	0.00221065	0.958214
Medication List reviewed	Medication List reviewed	Average Time Per Event (sec)	0.000465231	0.00685051	0.000103363	0.00026264	0.000667823	Increasing	0.00219905	0.960413
Web Review Flowsheets accessed	Flowsheets accessed	Average Time Per Event (sec)	-0.000758454	0.0065648	0.000136821	-0.00102662	-0.000490285	Decreasing	0.00210734	0.96252
Review Diagnoses Window accessed	Diagnosis list accessed	Average Time Per Event (sec)	0.00170087	0.00624908	0.000103396	0.00149822	0.00190353	Increasing	0.00200599	0.964526
Chief Complaint modified	Chief Complaint modified	Event Shown (1/0)	0.00232741	0.0055626	0.000112041	0.00210781	0.00254701	Increasing	0.00178563	0.966312
SmartForm viewed	Digital template viewed	Number of Loops	0.000114523	0.00537738	5.50015e-05	6.71962e-06	0.000222325	Increasing	0.00172617	0.968038
Visit diagnoses viewed	Visit diagnoses viewed	Number of Loops	0.000332407	0.00532475	6.81733e-05	0.000198787	0.000466026	Increasing	0.00170927	0.969747
Storyboard viewed	Patient overview viewed	Number of Loops	0.000229746	0.00497633	5.90839e-05	0.000113942	0.000345551	Increasing	0.00159743	0.971344
Home Medications modified	Home Medications modified	Average Time Per Event (sec)	0.000336393	0.00485132	0.000104324	0.000131917	0.000540869	Increasing	0.0015573	0.972902
SmartForm canceled	Digital Template canceled	Average Time Per Event (sec)	0.000169124	0.00481742	8.46807e-05	3.15019e-06	0.000335098	Increasing	0.00154642	0.974448
Child order released for a procedure order	Additional order released for a procedure order	Event Shown (1/0)	-0.000330145	0.00456927	5.24377e-05	-0.000432923	-0.000227367	Decreasing	0.00146676	0.975915
In Basket message viewed	Patient communications viewed	Event Shown (1/0)	0.00168683	0.0045221	6.082e-05	0.00156762	0.00180604	Increasing	0.00145162	0.977367
Flowsheet accepted	Flowsheet accepted	Event Shown (1/0)	0.000321881	0.00427756	8.63166e-05	0.0001527	0.000491061	Increasing	0.00137312	0.97874
OurPractice Advisories acknowledged	Care Alerts acknowledged	Average Time Per Event (sec)	0.000422922	0.00405179	7.91222e-05	0.000267842	0.000578001	Increasing	0.00130065	0.98004
Chart Review Encounter report viewed	Chart Review Encounter report viewed	Number of Loops	-0.000365374	0.0040386	8.20189e-05	-0.000526131	-0.000204617	Decreasing	0.00129641	0.981337
Care Everywhere document manually downloaded	External patient records manually downloaded	Number of Loops	-0.000558723	0.0039294	0.000164974	-0.000882071	-0.000235375	Decreasing	0.00126136	0.982598
Actions taken from an OurPractice Advisory	Actions taken from a care alert	Average Time Per Event (sec)	-0.000586787	0.00333024	6.87389e-05	-0.000721515	-0.000452058	Decreasing	0.00106903	0.983667
Clinical Note Signed	Clinical Note Signed	Event Shown (1/0)	-0.000274856	0.00322245	3.2956e-05	-0.00033945	-0.000210263	Decreasing	0.00103442	0.984702
Reconcile Outside Information accessed	Reconcile Outside Information accessed	Average Time Per Event (sec)	0.000187207	0.00302541	6.44912e-05	6.08043e-05	0.00031361	Increasing	0.000971172	0.985673
Allergies reviewed	Allergies reviewed	Average Time Per Event (sec)	0.000121025	0.00297571	4.94275e-05	2.41467e-05	0.000217903	Increasing	0.000955221	0.986628
Communication Management exited	Communication Management exited	Event Shown (1/0)	-8.00465e-05	0.00287693	3.03797e-05	-0.000139591	-2.05022e-05	Decreasing	0.000923511	0.987551
Report with patient data printed	Report with patient data printed	Event Shown (1/0)	0.000150638	0.00285176	7.52097e-05	3.22738e-06	0.00029805	Increasing	0.000915431	0.988467
Problem List reviewed	Problem List reviewed	Average Time Per Event (sec)	-0.000118899	0.00279892	4.04939e-05	-0.000198267	-3.95308e-05	Decreasing	0.00089847	0.989365
Care Teams viewed	Care Teams viewed	Event Shown (1/0)	0.000197849	0.00274656	6.3424e-05	7.35384e-05	0.000322161	Increasing	0.000881661	0.990247
Notes viewed	Notes viewed	Number of Loops	-0.000306693	0.00261	3.24406e-05	-0.000370276	-0.000243109	Decreasing	0.000837825	0.991085
Allergies reviewed	Allergies reviewed	Number of Loops	0.000110716	0.00228889	3.22938e-05	4.74197e-05	0.000174011	Increasing	0.000734746	0.99182
Care Teams viewed	Care Teams viewed	Average Time Per Event (sec)	0.000369645	0.00203464	6.23884e-05	0.000247363	0.000491926	Increasing	0.00065313	0.992473
Immunization record saved	Immunization record saved	Average Time Per Event (sec)	0.000109363	0.00198225	2.82908e-05	5.39126e-05	0.000164813	Increasing	0.000636312	0.993109
Web Review Flowsheets accessed	Flowsheets accessed	Event Shown (1/0)	-0.000166542	0.00196772	3.81554e-05	-0.000241326	-9.1757e-05	Decreasing	0.000631649	0.993741
Communication Management accessed	Communication Management accessed	Average Time Per Event (sec)	-0.000188741	0.00177583	2.81802e-05	-0.000243974	-0.000133507	Decreasing	0.00057005	0.994311
Medication List reviewed	Medication List reviewed	Number of Loops	0.000225966	0.00166953	2.4538e-05	0.000177872	0.000274061	Increasing	0.000535929	0.994847
Chief Complaint navigator section accessed	Chief Complaint section accessed	Number of Loops	-0.000223295	0.00165202	2.97884e-05	-0.000281681	-0.00016491	Decreasing	0.000530307	0.995377
Chief Complaint modified	Chief Complaint modified	Number of Loops	0.00020447	0.00151778	6.30047e-05	8.09806e-05	0.000327959	Increasing	0.000487216	0.995864
Care Everywhere document manually downloaded	External patient records manually downloaded	Event Shown (1/0)	-0.000170958	0.00144647	3.59153e-05	-0.000241352	-0.000100564	Decreasing	0.000464325	0.996328
Level of Service modified	Level of Service modified	Average Time Per Event (sec)	6.58237e-05	0.00137909	3.01417e-05	6.74606e-06	0.000124901	Increasing	0.000442697	0.996771
Diagnosis association updated	Diagnosis association updated	Event Shown (1/0)	0.000375168	0.00128411	4.3428e-05	0.000290049	0.000460287	Increasing	0.000412208	0.997183
SmartSet used	Order Set used	Number of Loops	0.000149992	0.00102316	3.49768e-05	8.14371e-05	0.000218546	Increasing	0.00032844	0.997512
Chart Review Encounter report viewed	Chart Review Encounter report viewed	Event Shown (1/0)	-8.58136e-05	0.000982817	1.50203e-05	-0.000115253	-5.63739e-05	Decreasing	0.00031549	0.997827
Report viewed	Report viewed	Event Shown (1/0)	0.000133609	0.00089724	3.27263e-05	6.94657e-05	0.000197753	Increasing	0.000288019	0.998115
Mobile patient visit recorder accessed	Mobile visit recorder opened	Event Shown (1/0)	0.000191248	0.000823945	5.38716e-05	8.56599e-05	0.000296837	Increasing	0.000264491	0.99838
OP Care Plan added	Outpatient Care Plan added	Average Time Per Event (sec)	-0.000245651	0.000644586	1.85401e-05	-0.000281989	-0.000209312	Decreasing	0.000206916	0.998587
Mobile patient visit recorder accessed	Mobile visit recorder opened	Average Time Per Event (sec)	0.00013116	0.000611331	3.969e-05	5.33677e-05	0.000208952	Increasing	0.000196241	0.998783
SmartForm canceled	Digital Template canceled	Number of Loops	0.000125865	0.000603258	3.10751e-05	6.4958e-05	0.000186772	Increasing	0.000193649	0.998977
Chart Review Media report viewed	Chart Review Media report viewed	Average Time Per Event (sec)	6.06051e-05	0.000528795	1.95869e-05	2.22148e-05	9.89955e-05	Increasing	0.000169746	0.999146
Problem List accessed	Problem List accessed	Number of Loops	5.19454e-05	0.000517172	1.59521e-05	2.06793e-05	8.32115e-05	Increasing	0.000166015	0.999312
Review Diagnoses Window accessed	Diagnosis list accessed	Number of Loops	-8.56805e-05	0.000425691	1.4929e-05	-0.000114941	-5.64197e-05	Decreasing	0.000136649	0.999449
Med warning displayed	Medication warning displayed	Number of Loops	0.000157819	0.000393479	2.1199e-05	0.000116269	0.000199369	Increasing	0.000126309	0.999575
SmartForm canceled	Digital Template canceled	Event Shown (1/0)	8.44829e-05	0.00032291	9.63427e-06	6.55998e-05	0.000103366	Increasing	0.000103656	0.999679
Result filed	Result filed	Event Shown (1/0)	0.000151462	0.000275764	1.00999e-05	0.000131666	0.000171257	Increasing	8.85218e-05	0.999768
Result entry accessed	Result entry accessed	Average Time Per Event (sec)	0.000104818	0.0002493	1.37886e-05	7.77921e-05	0.000131843	Increasing	8.00267e-05	0.999848
Problem and relevant info viewed in Problem List	Problem and relevant info viewed in Problem List	Average Time Per Event (sec)	-3.88298e-05	0.000246227	1.04809e-05	-5.93723e-05	-1.82874e-05	Decreasing	7.90403e-05	0.999927
Chart Review Order report viewed	Chart Review Order report viewed	Number of Loops	-5.3833e-05	0.000228741	1.17768e-05	-7.69155e-05	-3.07505e-05	Decreasing	7.34272e-05	1
